# Supplementary material for: 11C-Labeled Pictilisib (GDC-0941) as a Molecular Tracer Targeting Phosphatidylinositol 3-Kinase (PI3K) for Breast Cancer Imaging
Source: Hindawi journal article supplement (doi:10.1155/2019/1760184), 2019-11-03
Supplement: f1 [file 1760184.f1.pdf]

## **Title Page**

**Title:**  $^{11}\text{C}$  Labeled Pictilisib (GDC-0941) as a Molecular Tracer Targeting Phosphatidylinositol 3-kinase (PI3K) for Breast Cancer Imaging

**Authors:** Na Han,<sup>1,2,3</sup> Yaquin Jiang,<sup>1,2</sup> Yongkang Gai,<sup>1,2</sup> Qingyao Liu,<sup>1,2</sup> Lujie Yuan,<sup>1,2</sup> Yichun Wang,<sup>1,2</sup> Mengting Li,<sup>1,2</sup> Yongxue Zhang,<sup>1,2</sup> Xiaoli Lan,<sup>1,2\*</sup>

### **Author information**

<sup>1</sup>*Department of Nuclear Medicine, Union Hospital, Tongji Medical College, Huazhong University of Science and Technology, Wuhan 430022, China*

<sup>2</sup>*Hubei Key Laboratory of Molecular Imaging, Wuhan 430022, China*

<sup>3</sup>*Department of Nuclear Medicine, The Affiliated Hospital of Qingdao University, No.16 JiangSu Road, Qingdao, Shandong Province 266000, China*

**\*Corresponding author:** Xiaoli Lan, M.D, Ph.D.

Address: Department of Nuclear Medicine, Union Hospital, No. 1277 Jiefang Ave, Wuhan, Hubei Province 430022, China.

Tel.: +86-27-83692633(O), +86-13886193262(mobile); Fax: +86-27-85726282.

E-mail: LXL730724@hotmail.com

### **Funding**

This work was supported by the National Natural Science Foundation of China (No. 81630049 and 81771863).

### **Conflicts of interest**

The authors declare no potential conflicts of interest.

## **Supplement data**

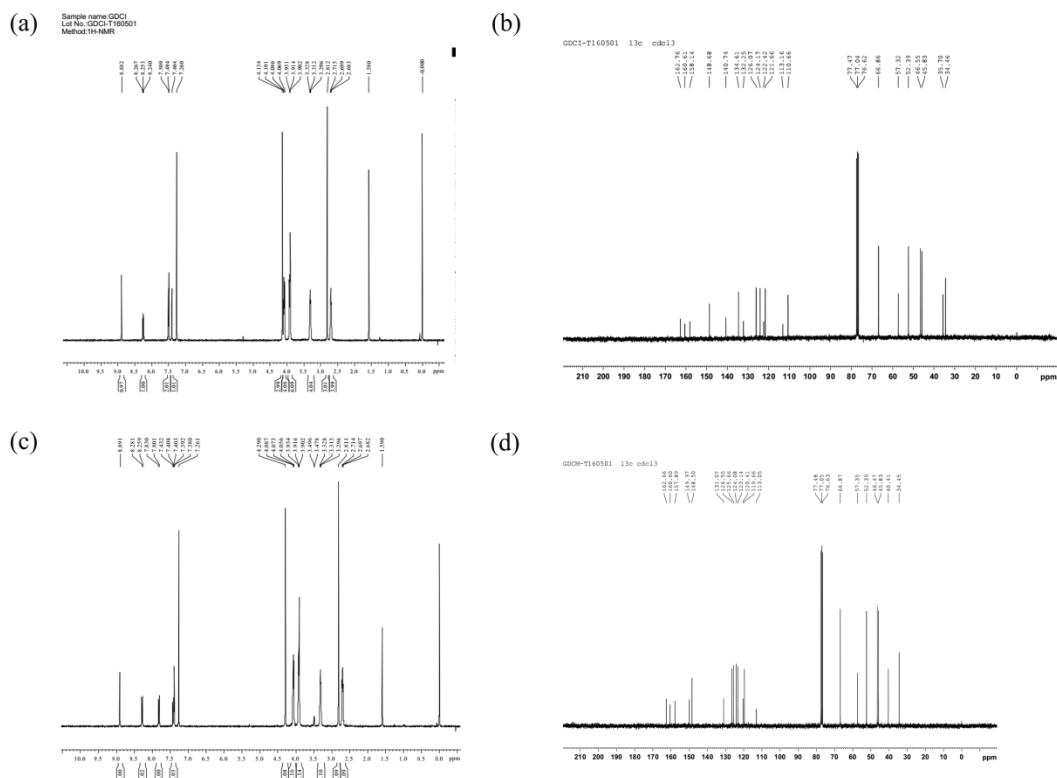

**Figure S1:** (a) and (b) showed the  $^1\text{H-NMR}$  and  $^{13}\text{C-NMR}$  of GDCI. (c) and (d) showed the  $^1\text{H-NMR}$  and  $^{13}\text{C-NMR}$  of GDCM.

### NMR spectroscopy:

#### GDCI $^1\text{H-NMR}$ (300MHz, $\text{CDCl}_3$ ) :

$\delta$ 8.882(s,1H), $\delta$ 8.253(t, $J=4.05\text{Hz}$ ,1H), $\delta$ 7.494(d, $J=4.5\text{Hz}$ ,2H), $\delta$ 7.404(s,1H), $\delta$ 4.134(s,3H), $\delta$ 4.086(t, $J=4.8\text{Hz}$ ,4H), $\delta$ 3.914(t, $J=5.1\text{Hz}$ ,4H), $\delta$ 3.902(s,2H), $\delta$ 3.312(t, $J=4.8\text{Hz}$ ,4H), $\delta$ 2.812(s,3H), $\delta$ 2.699(t,  $J=4.8\text{Hz}$ ,4H);

#### GDCI $^{13}\text{C NMR}$ ( $\text{CDCl}_3$ ):

$\delta$ 162.76,160.61,158.14,148.68,140.74,134.61,132.25,126.07,124.17,122.42,121.66,113.16,110.66,77.47,77.04,76.62,66.86,57.32,52.39,46.55,45.83,35.70,34.46;

#### GDCM $^1\text{H-NMR}$ (300MHz, $\text{CDCl}_3$ ):

$\delta$ 8.891(s,1H), $\delta$ 8.259(d, $J=6.6\text{Hz}$ ,1H), $\delta$ 7.801(d, $J=8.7\text{Hz}$ ,1H), $\delta$ 7.408(dd, $J=7.2,8.7\text{Hz}$ ,1H), $\delta$ 7.380(s,1H), $\delta$ 4.290(s,3H), $\delta$ 4.073(t, $J=4.65\text{Hz}$ ,4H), $\delta$ 3.916(t, $J=4.8\text{Hz}$ ,4H), $\delta$ 3.902(s,2H), $\delta$ 3.313(t, $J=4.8\text{Hz}$ ,4H),  $\delta$ 2.811(s,3H), $\delta$ 2.697(t,  $J=4.8\text{Hz}$ ,4H);

**GDCM <sup>13</sup>CNMR(CDCl<sub>3</sub>):**

δ162.66,160.60,157.89,149.97,148.50,131.07,126.55,125.66,124.08,123.14,120.41,119.66,113.05,77.48,77.05,76.63,66.87,57.35,52.39,46.47,45.83,40.41,34.45.

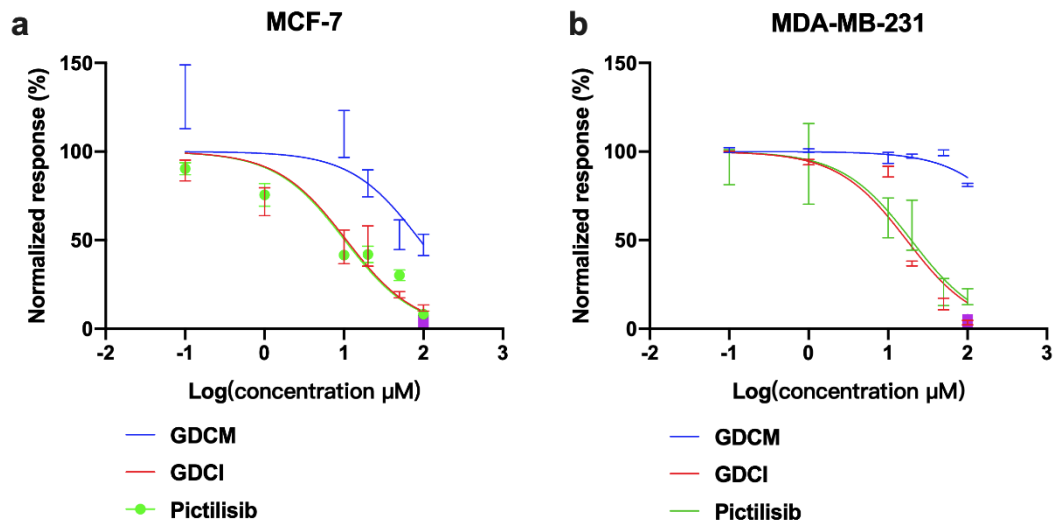

**Figure S2** Normalized dose response of the drug for the two cell lines

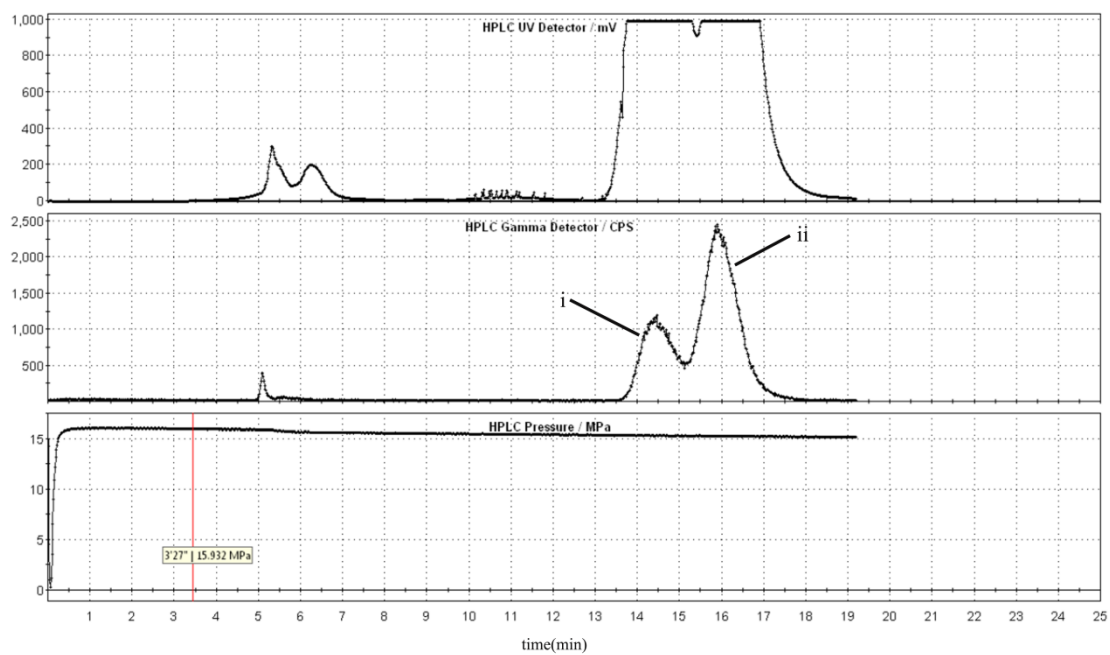

**Figure S3:** The reaction products were purified by semi-preparative HPLC. i was [ $^{11}\text{C}$ ]-GDCM and ii was [ $^{11}\text{C}$ ]-GDCl.
